# Supplementary material
Source: PubMed Central journal article supplement (PMC2561922)
Supplement: NIHMS53299-supplement-6.pdf [file NIHMS53299-supplement-6.pdf]

## Supplementary Table S1

**Table S1.** Molecule numbers of internalized BL22 and FMC63(Fv)-PE38

|       | 100 nM           |                  |           | 10 nM            |                |           |
|-------|------------------|------------------|-----------|------------------|----------------|-----------|
|       | CD22             | CD19             | CD22/CD19 | CD22             | CD19           | CD22/CD19 |
| BL74  | 70,000<br>(270)  | 15,000<br>(6.4)  | 4.7       | 42,000<br>(162)  | 2,500<br>(1.1) | 16.8      |
| CA46  | 246,000<br>(261) | 53,000<br>(15)   | 4.6       | 148,000<br>(156) | 9,800<br>(2.8) | 15.1      |
| DOHH2 | 143,000<br>(311) | 40,000<br>(16.6) | 3.6       | 82,000<br>(178)  | 6,800<br>(2.8) | 12.1      |
| KEMI  | 32,000<br>(97)   | 11,000<br>(5.2)  | 2.9       | 18,000<br>(55)   | 2,800<br>(1.3) | 6.4       |
| Raji  | 186,000<br>(300) | 55,000<br>(9.5)  | 3.4       | 83,000<br>(134)  | 8,400<br>(1.5) | 9.9       |
| Ramos | 91,000<br>(260)  | 21,000<br>(9.5)  | 4.3       | 48,000<br>(134)  | 4,600<br>(2.1) | 10.4      |

Cells were incubated 100 nM or 10 nM of Alexa-488 labeled ITs at 37°C for 1 hr. Internalized molecule amount is calculated based on the internalized MFI. The percentage compared to cell surface bound amount is shown in parenthesis.
